# Supplementary material for: The effect of depressive symptomatology on the association of vitamin D and sleep
Source: Springer Nature journal article supplement (doi:10.1186/s12888-021-03176-4), 2021-04-06
Supplement: MOESM2 [file 19040222]

# The effect of depressive symptomatology on the association of vitamin D and sleep

## Supplement S2: Results of regression analyses

Roland Mergl <sup>1\*</sup>, Ezgi Dogan-Sander <sup>2\*</sup>, Anja Willenberg <sup>3</sup>, Kerstin Wirkner <sup>4,5</sup>, Jürgen Kratzsch <sup>3,4</sup>, Steffi Riedel-Heller <sup>4,6</sup>, Antje-Kathrin Allgaier <sup>1</sup>, Ulrich Hegerl <sup>7</sup>, Christian Sander <sup>2,4</sup>

\* Both authors equally contributed to the manuscript.

<sup>1</sup> Institute of Psychology, Universität der Bundeswehr München, Neubiberg, Germany

<sup>2</sup> Department of Psychiatry and Psychotherapy, University of Leipzig Medical Center, Leipzig, Germany

<sup>3</sup> Institute of Laboratory Medicine, Clinical Chemistry and Molecular Diagnostics, University of Leipzig Medical Center, Leipzig, Germany

<sup>4</sup> LIFE - Leipzig Research Center for Civilization Diseases, University of Leipzig, Leipzig, Germany

<sup>5</sup> Institute for Medical Informatics, Statistics and Epidemiology (IMISE), University of Leipzig, Leipzig, Germany

<sup>6</sup> Institute of Social Medicine, Occupational Health and Public Health, University of Leipzig, Leipzig, Germany

<sup>7</sup> Department of Psychiatry, Psychosomatics, and Psychotherapy, Goethe University Frankfurt, Frankfurt am Main, Germany

22 **Table S1. Results of regression analyses regarding the role of the severity of depressive**  
 23 **symptoms as possible moderator for the association of vitamin D concentrations and night**  
 24 **sleep parameters**

| <i>Independent variables</i>                      | <i>b [95% CI]</i>          | <i>beta</i> | <i>p</i> |
|---------------------------------------------------|----------------------------|-------------|----------|
| <i>Night sleep duration as dependent variable</i> |                            |             |          |
| 1. Model without any covariates                   |                            |             |          |
| CES-D sum score (without item 11) (CES-D)         | 0.001<br>[-0.019;0.022]    | 0.009       | 0.892    |
| Vitamin D concentration (Vit D)                   | 0.007<br>[-0.002;0.016]    | 0.080       | 0.106    |
| CES-D x Vit D                                     | -0.00006<br>[-0.001;0.001] | -0.010      | 0.891    |
| 2. Model with covariates                          |                            |             |          |
| CES-D sum score (without item 11) (CES-D)         | 0.002<br>[-0.019;0.022]    | 0.010       | 0.872    |
| Vitamin D concentration (Vit D)                   | 0.004<br>[-0.005;0.012]    | 0.041       | 0.407    |
| CES-D x Vit D                                     | -0.00003<br>[-0.001;0.001] | -0.006      | 0.938    |
| <i>Midsleep time as dependent variable</i>        |                            |             |          |
| 1. Model without any covariates                   |                            |             |          |
| CES-D sum score (without item 11) (CES-D)         | 0.007<br>[-0.011;0.024]    | 0.048       | 0.465    |
| Vitamin D concentration (Vit D)                   | 0.00004<br>[-0.007;0.007]  | 0.001       | 0.991    |
| CES-D x Vit D                                     | -0.0001<br>[-0.001;0.001]  | -0.025      | 0.735    |
| 2. Model with covariates                          |                            |             |          |
| CES-D sum score (without item 11) (CES-D)         | 0.007<br>[-0.010;0.025]    | 0.052       | 0.425    |
| Vitamin D concentration (Vit D)                   | 0.00042<br>[-0.007;0.008]  | 0.006       | 0.913    |
| CES-D x Vit D                                     | -0.00015<br>[-0.001;0.001] | -0.031      | 0.681    |

25 *Notes: b: unstandardized regression coefficient; beta: standardized regression coefficient; CES-*  
 26 *D: German version of the Centre for Epidemiological Studies Depression Scale (CES-D, [35, 36])*  
 27 *– the corresponding sum score has been modified by subtracting item 11 (reflecting the*  
 28 *intensity of sleep problems) from the original total score; CI: confidence interval; p: p value.*  
 29 *The results of different linear regression models are given: models without any covariates and*  
 30 *models with covariates (age, the BMI score and the season in which vitamin D concentrations*  
 31 *had been measured).*  
 32
